# Supplementary material for: Assessment of the Utility of Social Media for Broad-Ranging Statistical Signal Detection in Pharmacovigilance: Results from the WEB-RADR Project
Source: PubMed Central journal article supplement — Drug Saf. 2018 Jul 24;41(12):1355–69. doi: 10.1007/s40264-018-0699-2 (PMC6223695; doi:10.1007/s40264-018-0699-2), 2018-07-24
Supplement: 40264_2018_699_MOESM2_ESM.pdf [file 40264_2018_699_MOESM2_ESM.pdf]

## Online Resource 2: Patient fora

This is a *Drug Safety* online resource of the article ‘An assessment of the utility of social media for broad-ranging statistical signal detection in pharmacovigilance: Results from the WEB-RADR project’ by Ola Caster, Juergen Dietrich, Marie-Laure Kürzinger, Magnus Lerch, Simon Maskell, G. Niklas Norén, Stéphanie Tcherny-Lessenot, Benoit Vroman, Antoni Wisniewski, and John van Stekelenborg.

Corresponding author is Ola Caster (ola.caster@who-umc.org), Uppsala Monitoring Centre, Box 1051, 75140 Uppsala, Sweden.

Table 1. The 407 patient fora with at least one post used in this study, presented in order of decreasing number of posts.

| Patient forum                | Number of posts |
|------------------------------|-----------------|
| reddit.com                   | 14751           |
| inspire.com                  | 2966            |
| babycenter.com               | 2358            |
| magrossesse.com              | 1852            |
| breastcancer.org             | 1779            |
| drugs-forum.com              | 1515            |
| diabetessupport.co.uk        | 1221            |
| tremek.com                   | 1032            |
| babiesbase.com               | 862             |
| discussfitness.com           | 802             |
| natali.ua                    | 791             |
| marriagesherpa.com           | 647             |
| healthunlocked.com           | 530             |
| expansion.com                | 507             |
| windowsvn.net                | 504             |
| www.breastcancer.org         | 485             |
| her2support.org              | 443             |
| fordclub.co.uk               | 424             |
| fanmail.biz                  | 364             |
| killdevilhill.com            | 336             |
| talkingcity.com              | 306             |
| msexchange.org               | 295             |
| www.tudiabetes.org           | 268             |
| www.thebump.com              | 249             |
| www.whattoexpect.com         | 234             |
| www.babycenter.ca            | 232             |
| japancar.ru                  | 224             |
| www.healthcaremagic.com      | 219             |
| macmillan.org.uk             | 207             |
| zp.ua                        | 195             |
| google.com                   | 186             |
| whattoexpect.com             | 154             |
| www.medhelp.org              | 152             |
| www.childrenwithdiabetes.com | 137             |
| dailystrength.org            | 132             |
| www.healingwell.com          | 130             |
| addforums.com                | 125             |

|                              |     |
|------------------------------|-----|
| kr.ua                        | 122 |
| www.cafepharma.com           | 116 |
| thebump.com                  | 114 |
| healingwell.com              | 114 |
| healthcaremagic.com          | 111 |
| 4minsk.by                    | 103 |
| breastcancercare.org.uk      | 103 |
| schizophrenia.com            | 101 |
| www.steroidology.com         | 101 |
| dubna.ru                     | 92  |
| medschat.com                 | 81  |
| devchata.info                | 78  |
| www.fertilethoughts.com      | 76  |
| 234gm.com                    | 75  |
| www.thelupussite.com         | 73  |
| dcurbanmom.com               | 73  |
| babycenter.ca                | 69  |
| tudiabetes.org               | 68  |
| www.patient.co.uk            | 62  |
| babycenter.com.au            | 60  |
| cancer.org                   | 58  |
| www.dcurbanmom.com           | 58  |
| steroidology.com             | 57  |
| crazymeds.us                 | 56  |
| khabara.ru                   | 55  |
| www.diabetes.org             | 55  |
| www.coping-with-epilepsy.com | 54  |
| www.addforums.com            | 53  |
| www.healthboards.com         | 52  |
| diabetes.org                 | 51  |
| jiempaifan.com               | 48  |
| myfitnesspal.com             | 48  |
| coping-with-epilepsy.com     | 48  |
| www.cafemom.com              | 47  |
| anhui0001.com                | 47  |
| lifenet-sy.com               | 45  |
| lowcarber.org                | 43  |
| pdsa.org                     | 40  |
| healthboards.com             | 40  |
| medhelp.org                  | 39  |
| pojdt-dal.cz                 | 39  |
| proboards.com                | 39  |
| www.crohnsforum.com          | 39  |
| loronline.ru                 | 39  |
| crohnsforum.com              | 38  |
| corvette-nation.com          | 38  |
| www.mdjunction.com           | 36  |
| www.city-data.com            | 35  |
| cenyenergie.cz               | 34  |
| freeforums.org               | 32  |
| insuranceforums.info         | 31  |
| www.elitefitness.com         | 30  |
| hystersisters.com            | 30  |
| city-data.com                | 30  |
| cogknowhow.com               | 30  |
| elaws.cc                     | 29  |
| fertilethoughts.com          | 29  |

|                         |    |
|-------------------------|----|
| cancercompass.com       | 28 |
| mal-kuz.ru              | 28 |
| myelomabeacon.com       | 27 |
| fashionsuca.com         | 27 |
| anxietyzone.com         | 27 |
| phoenixrising.me        | 26 |
| glucosebuddy.com        | 26 |
| patient.co.uk           | 26 |
| diabetes.co.uk          | 25 |
| netmums.com             | 25 |
| kinopoisk.ru            | 24 |
| forumnik.com            | 24 |
| www.webmd.com           | 22 |
| wwgupiao.com            | 22 |
| psychforums.com         | 21 |
| chevyforum.ru           | 21 |
| www.cancer.org          | 20 |
| yahoo.com               | 20 |
| rutalk.co.uk            | 20 |
| tolstushka.info         | 19 |
| forums.delphiforums.com | 19 |
| cancerforums.net        | 19 |
| advfn.com               | 19 |
| www.myfitnesspal.com    | 19 |
| studentdoctor.net       | 19 |
| ivd.ru                  | 19 |
| bodybuilding.com        | 18 |
| qingyutrip.com          | 17 |
| www.weightwatchers.com  | 17 |
| colonclub.com           | 17 |
| shybi.com               | 16 |
| ehealthforum.com        | 15 |
| 4hbtalk.com             | 15 |
| passion.ru              | 15 |
| www.anxietyzone.com     | 15 |
| 0470365.com             | 15 |
| www.ehealthforum.com    | 14 |
| www.circleofmoms.com    | 14 |
| forumdebian.com.br      | 14 |
| hzxfd.com               | 14 |
| benzobuddies.org        | 14 |
| www.psychforums.com     | 13 |
| tiboweb.com             | 13 |
| igzmu.com               | 13 |
| spine-health.com        | 12 |
| justmommies.com         | 12 |
| qvc.com                 | 12 |
| baoshanhui.cn           | 12 |
| navigatingcancer.com    | 12 |
| cszx.com                | 12 |
| fairfaxunderground.com  | 11 |
| www.prohealth.com       | 11 |
| epilepsy.com            | 11 |
| diabetes-support.org.uk | 11 |
| englishsabra.com        | 11 |
| www.bodybuilding.com    | 11 |
| egrouplets.com          | 11 |

|                            |    |
|----------------------------|----|
| webmd.com                  | 10 |
| fertilityfriends.co.uk     | 10 |
| fertility.org              | 10 |
| live-kaluga.ru             | 10 |
| zdfcy.com                  | 9  |
| www.diabetes.co.uk         | 9  |
| investorvillage.com        | 9  |
| rmj.ru                     | 9  |
| gorforum.ru                | 9  |
| qsqs.pw                    | 9  |
| sudogda.su                 | 9  |
| www.wehavelupus.com        | 8  |
| suzuki-club.org            | 8  |
| nep.net.cn                 | 8  |
| www.myelomabeacon.com      | 8  |
| jozefoslaw24.pl            | 8  |
| cafemom.com                | 8  |
| mumsnet.com                | 8  |
| www.copd-international.com | 8  |
| sabaya.ae                  | 8  |
| yuku.com                   | 8  |
| steroid.com                | 8  |
| bonesmart.org              | 7  |
| ydmsw.cn                   | 7  |
| itjiejue.com               | 7  |
| menopausematters.co.uk     | 7  |
| childrenwithdiabetes.com   | 7  |
| elitefitness.com           | 7  |
| diybanter.com              | 7  |
| cancergrace.org            | 7  |
| mssociety.org.uk           | 7  |
| gulft.com                  | 7  |
| bbsex.org                  | 6  |
| portalnet.cl               | 6  |
| ar15.com                   | 6  |
| www.cancerforums.net       | 6  |
| lungevity.org              | 6  |
| facebook.com               | 6  |
| wzfishing.com              | 6  |
| longecity.org              | 6  |
| podolsk.ru                 | 6  |
| drugs.com                  | 5  |
| rareconnect.org            | 5  |
| melanoma.org               | 5  |
| delphiforums.com           | 5  |
| www.constantchatter.com    | 5  |
| rzn.info                   | 5  |
| spondylitis.org            | 5  |
| www.colonclub.com          | 5  |
| ormingle.com.au            | 5  |
| activeboard.com            | 5  |
| psychcentral.com           | 5  |
| copd-international.com     | 5  |
| www.experienceproject.com  | 5  |
| boards.net                 | 5  |
| neurotalk.psychcentral.com | 5  |
| 500yun.com                 | 4  |

|                                 |   |
|---------------------------------|---|
| cafeprima.com                   | 4 |
| topix.com                       | 4 |
| baobao511.com                   | 4 |
| ipci.ca                         | 4 |
| maquinariaparatodos.com         | 4 |
| zhongwangpz.com                 | 4 |
| mdjunction.com                  | 4 |
| acne.org                        | 4 |
| moheet.com                      | 4 |
| www.bigfooty.com                | 4 |
| podapi.com                      | 4 |
| cancer-forums.net               | 4 |
| afullcup.com                    | 3 |
| menshealth.com                  | 3 |
| home-school.com                 | 3 |
| mnkd.proboards.com              | 3 |
| prohormoneforum.com             | 3 |
| jbrcommunity.com                | 3 |
| hgba.cn                         | 3 |
| dasuqian.cn                     | 3 |
| flashback.org                   | 3 |
| cnchinese.com                   | 3 |
| diabetesdaily.com               | 3 |
| au.answers.yahoo.com            | 3 |
| ic-network.com                  | 3 |
| mybroadband.co.za               | 3 |
| diabetesforums.com              | 3 |
| cancerresearchuk.org            | 3 |
| py112.com                       | 3 |
| www.macmillan.org.uk            | 3 |
| gaiaonline.com                  | 3 |
| www.quitsmokingmessageboard.com | 3 |
| rosaceagroup.org                | 3 |
| babycenter.in                   | 3 |
| diaperswappers.com              | 3 |
| avto-dio.ru                     | 3 |
| 51maicp.com                     | 2 |
| www.justmommies.com             | 2 |
| www.bikeforums.net              | 2 |
| forumer.com                     | 2 |
| colt-club.ru                    | 2 |
| baidu.com                       | 2 |
| dinet.org                       | 2 |
| freeforums.net                  | 2 |
| amazon.com                      | 2 |
| psychlinks.ca                   | 2 |
| www.spondylitis.org             | 2 |
| purseblog.com                   | 2 |
| forobuceo.com                   | 2 |
| freeskier.com                   | 2 |
| answers.yahoo.com               | 2 |
| allnurses.com                   | 2 |
| www.babycenter.in               | 2 |
| diabeticconnect.com             | 2 |
| agingcare.com                   | 2 |
| bmwpost.ru                      | 2 |
| ivf.ca                          | 2 |

|                             |   |
|-----------------------------|---|
| server-ups.com              | 2 |
| www.netmums.com             | 2 |
| siliconinvestor.com         | 2 |
| lestracteursrouges.com      | 2 |
| sofeminine.co.uk            | 2 |
| uk.answers.yahoo.com        | 2 |
| stackoverflow.com           | 2 |
| weightwatchers.com          | 2 |
| startimes.com               | 2 |
| whisky-distilleries.info    | 2 |
| hbhw.cn                     | 2 |
| wnp.pl                      | 2 |
| straightdope.com            | 2 |
| finanzforen24.de            | 2 |
| arthritiscare.org.uk        | 2 |
| bikeforums.net              | 2 |
| digitalspy.co.uk            | 2 |
| almostsmart.com             | 2 |
| lowyat.net                  | 2 |
| insulinpumpforums.com       | 2 |
| aveo.com.ua                 | 2 |
| flyertalk.com               | 2 |
| texags.com                  | 2 |
| baby-cafe.cz                | 2 |
| yxww.cn                     | 2 |
| conductdisorders.com        | 2 |
| depressionforums.org        | 2 |
| chromeplugins.org           | 2 |
| finance.yahoo.com           | 2 |
| cobaltss.com                | 2 |
| touareg-club.net            | 2 |
| xygyxd.com                  | 2 |
| botanical-online.com        | 2 |
| boxcdn.cn                   | 2 |
| uol.com.br                  | 2 |
| freebusinessforums.co.uk    | 1 |
| overclockers.co.uk          | 1 |
| kia-club.ru                 | 1 |
| terrawoman.com              | 1 |
| ioplist.com                 | 1 |
| forumhouse.ru               | 1 |
| ford-trucks.com             | 1 |
| exbii.com                   | 1 |
| obesityhelp.com             | 1 |
| loonf.org                   | 1 |
| sluchay.ru                  | 1 |
| mamask.ru                   | 1 |
| hairlosshelp.com            | 1 |
| quitsmokingmessageboard.com | 1 |
| 11freunde.de                | 1 |
| theologyonline.com          | 1 |
| jylt.cc                     | 1 |
| thestudentroom.co.uk        | 1 |
| circleofmoms.com            | 1 |
| thisisms.com                | 1 |
| lada-forum.ru               | 1 |
| ms-people.com               | 1 |

|                                         |   |
|-----------------------------------------|---|
| indoreefclub.com                        | 1 |
| todoexpertos.com                        | 1 |
| complaintwire.org                       | 1 |
| agricultureinformation.com              | 1 |
| ironmagazineforums.com                  | 1 |
| topgoldforum.com                        | 1 |
| ccp.so                                  | 1 |
| gazeta.pl                               | 1 |
| comicbookresources.com                  | 1 |
| getbig.com                              | 1 |
| joomlaportal.de                         | 1 |
| redandwhitekop.com                      | 1 |
| chosaigon.edu.vn                        | 1 |
| tt.tennis-warehouse.com                 | 1 |
| forumchitchat.com                       | 1 |
| bimmerfest.com                          | 1 |
| www.rareconnect.org                     | 1 |
| pinoyden.com.ph                         | 1 |
| www.swissmomforum.ch                    | 1 |
| youreable.com                           | 1 |
| csc-china.com.cn                        | 1 |
| yourpetforums.co.uk                     | 1 |
| babycentre.co.uk                        | 1 |
| mexicoarmado.com                        | 1 |
| yichashuo.com                           | 1 |
| veggieboards.com                        | 1 |
| cpaptalk.com                            | 1 |
| verejnadiskusia.sk                      | 1 |
| diabetesforum.com                       | 1 |
| vseoglazah.ru                           | 1 |
| gute-fahrt.de                           | 1 |
| hsjdsy.com                              | 1 |
| naviny.by                               | 1 |
| websitetoolbox.com                      | 1 |
| 2tkx.com                                | 1 |
| webtender.com                           | 1 |
| duramaxforum.com                        | 1 |
| webuser.co.uk                           | 1 |
| www.diabetesdaily.com                   | 1 |
| runnersworld.com                        | 1 |
| 0774cx.com                              | 1 |
| welltrainedmind.com                     | 1 |
| jiankangzhijia.com.cn                   | 1 |
| cosplayhelper.com                       | 1 |
| chiefdelphi.com                         | 1 |
| pistonheads.com                         | 1 |
| steadyhealth.com                        | 1 |
| microsoft.com                           | 1 |
| hardware.fr                             | 1 |
| wir-frauen-im-netz.de                   | 1 |
| cruisersforum.com                       | 1 |
| ozpolitic.com                           | 1 |
| psoriasisclub.org                       | 1 |
| wrestlingforum.com                      | 1 |
| newagtalk.com                           | 1 |
| hwaml.com                               | 1 |
| nosurrenderbreastcancersupportforum.com | 1 |

|                         |              |
|-------------------------|--------------|
| antispam-ev.de          | 1            |
| fengshenre.com          | 1            |
| disboards.com           | 1            |
| www.strokeboard.net     | 1            |
| shaiyabeginning.com     | 1            |
| 51love.ca               | 1            |
| shiftdelete.net         | 1            |
| ali213.net              | 1            |
| guomo123.com            | 1            |
| oooforum.org            | 1            |
| siasat.pk               | 1            |
| supereader.com          | 1            |
| ibsgroup.org            | 1            |
| susans.org              | 1            |
| bimmerclassics.com      | 1            |
| emtlife.com             | 1            |
| icpcha.com              | 1            |
| dentalfearcentral.org   | 1            |
| forumok.ru              | 1            |
| curezone.org            | 1            |
| uoo.la                  | 1            |
| vagabonders-supreme.net | 1            |
| zetaboards.com          | 1            |
| thedibb.co.uk           | 1            |
| zonatuning.com          | 1            |
| theknot.com             | 1            |
| thelion.com             | 1            |
| lipstickalley.com       | 1            |
| <b>Total</b>            | <b>42721</b> |
