# Supplementary material for: Assessment of the Utility of Social Media for Broad-Ranging Statistical Signal Detection in Pharmacovigilance: Results from the WEB-RADR Project
Source: PubMed Central journal article supplement — Drug Saf. 2018 Jul 24;41(12):1355–69. doi: 10.1007/s40264-018-0699-2 (PMC6223695; doi:10.1007/s40264-018-0699-2), 2018-07-24
Supplement: 40264_2018_699_MOESM3_ESM.pdf [file 40264_2018_699_MOESM3_ESM.pdf]

## Online Resource 3: Construction of WEB-RADR reference set

This is a *Drug Safety* online resource of the article '*An assessment of the utility of social media for broad-ranging statistical signal detection in pharmacovigilance: Results from the WEB-RADR project*' by Ola Caster, Juergen Dietrich, Marie-Laure Kürzinger, Magnus Lerch, Simon Maskell, G. Niklas Norén, Stéphanie Tcherny-Lessenot, Benoit Vroman, Antoni Wisniewski, and John van Stekelenborg.

Corresponding author is Ola Caster (ola.caster@who-umc.org), Uppsala Monitoring Centre, Box 1051, 75140 Uppsala, Sweden.

As mentioned in the main article (see Section 2.2.2), the Harpaz reference set was complemented by the more relevant WEB-RADR reference set, focussing on product/event combinations (PECs) that were identified as validated signals by the participating manufacturers during the study period. The step-by-step process that was followed to construct this reference set is presented in the following flowchart.

**Identification of positive controls for each drug (denoted *Drug X*) in Table 1 of Online Resource 1:**

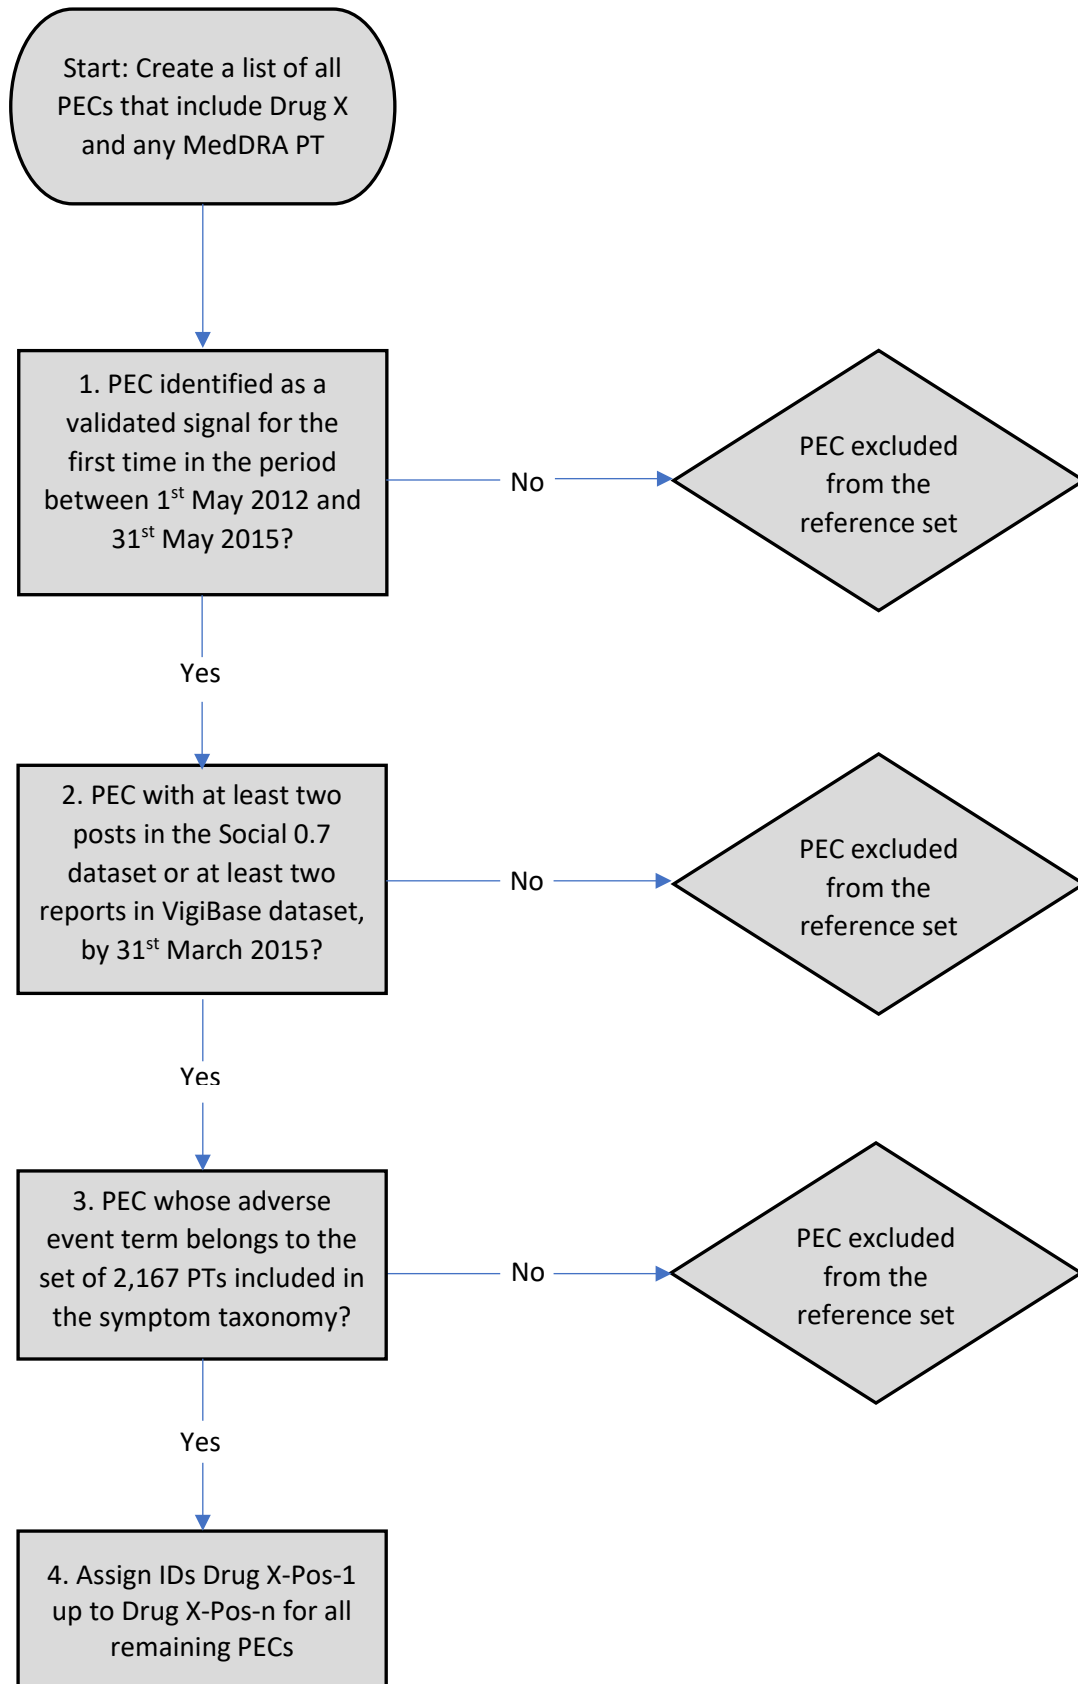

**Identification of negative controls for each drug (denoted *Drug X*) in Table 1 of Online Resource 1:**

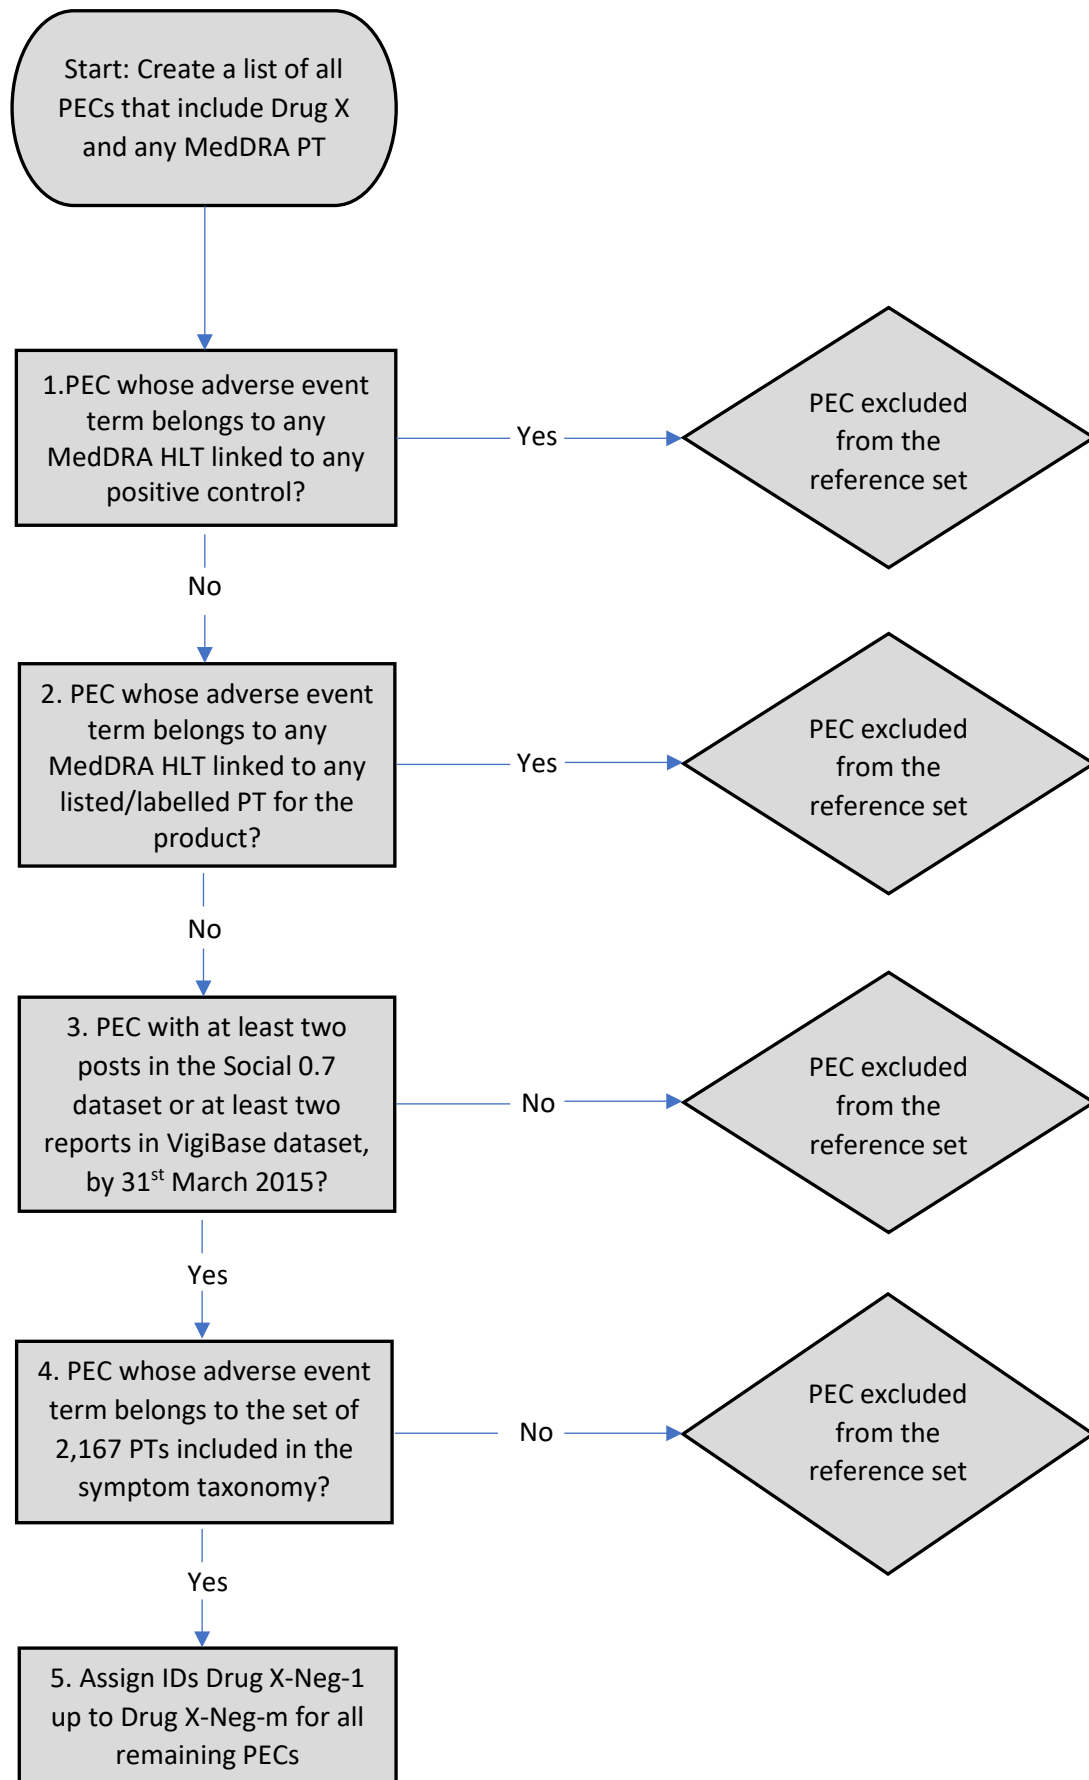

### Building the WEB-RADR Reference Set:

Consolidate the list of positive and negative controls for all drugs in Table 1 of Online Resource 1

WEB-RADR reference set  
(200 positive and 5332 negative controls)

| ID           | Pos/Neg | Index Date |
|--------------|---------|------------|
| Drug 1-Pos-1 | Pos     | Feb 2013   |
| Drug 1-Pos-2 | Pos     | Aug 2014   |
| ...          | ...     | ...        |
| Drug X-Pos-1 | Pos     | Dec 2012   |
| ...          | ...     | ...        |
| Drug X-Pos-n | Pos     | Jan 2015   |
| ...          | ...     | ...        |
| ...          | ...     | ...        |
| Drug 1-Neg-1 | Neg     | April 2014 |
| Drug 1-Neg-2 | Neg     | Nov 2013   |
| ...          | ...     | ...        |
| Drug X-Neg-1 | Neg     | Jan 2015   |
| ...          | ...     | ...        |
| Drug X-Neg-m | Neg     | Dec 2014   |
| ...          | ...     | ...        |
| ...          | ...     | ...        |

Positive controls for Drug X

Negative controls for Drug X
